# Supplementary material for: Adsorption of divalent cadmium by calcified iron-embedded carbon beads
Source: Royal Society of Chemistry journal article supplement (doi:10.1039/c9ra10309k), 2020-01-01
Supplement: c9ra10309k1.pdf [file c9ra10309k1.pdf]

## Table of contents

1. Figure S1. Raman spectra of Fe/SA-C.
2. Figure S2. SEM image of Fe/SA-C bead.
3. Figure S3. Linear fit of (a) Freundlich model and (b) Temkin model at different temperatures.
4. Figure S4. The plot between  $\ln K_c$  and  $1/T$ .
5. Figure S5. Reuse efficiency of adsorbent.
6. Figure S6. (a) Magnetic hysteresis curve of Fe/SA-C at room temperature; (b) magnetic propriety of Fe/SA-C.

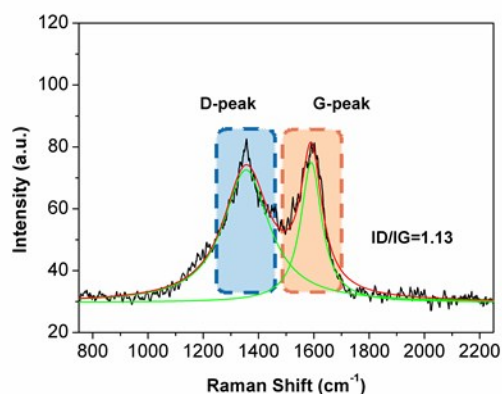

Figure S1. Raman spectra of Fe/SA-C.

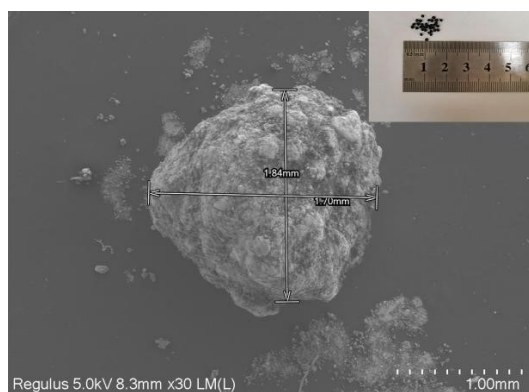

Figure S2. SEM image of Fe/SA-C bead.

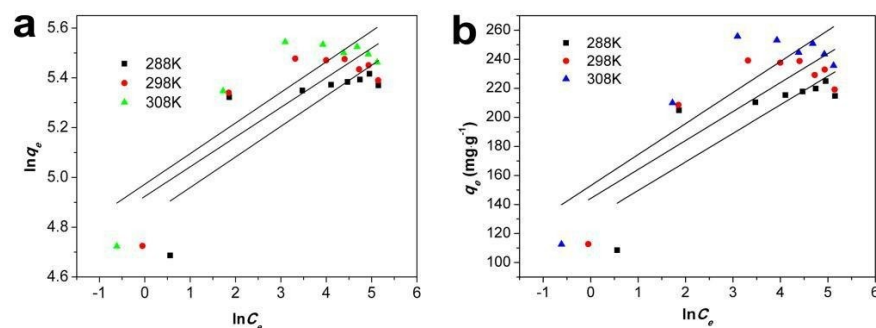

Figure S3. Linear fit of (a) Freundlich model and (b) Temkin model at different temperatures.

Linear equations at different temperatures are listed below:

Freundlich model:

$$288\text{K: } \ln q_e = 0.1227 \ln C_e + 4.8366 \quad (R^2 = 0.626)$$

$$298\text{K: } \ln q_e = 0.1191 \ln C_e + 4.9235 \quad (R^2 = 0.656)$$

308K:  $\ln q_e = 0.1229 \ln C_e + 4.9726$  ( $R^2 = 0.726$ )

Temkin model:

288K:  $q_e = 19.688 \ln C_e + 129.90$  ( $R^2 = 0.662$ )

298K:  $q_e = 19.947 \ln C_e + 144.13$  ( $R^2 = 0.661$ )

308K:  $q_e = 21.372 \ln C_e + 152.97$  ( $R^2 = 0.733$ )

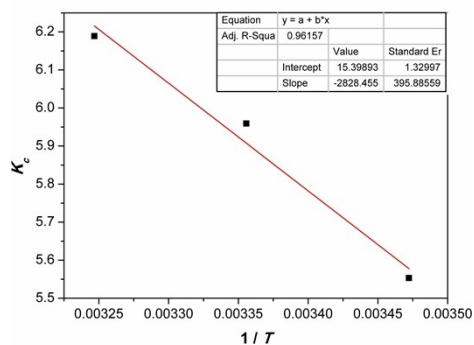

Figure S4. The plot between  $\ln K_c$  and  $1/T$ .

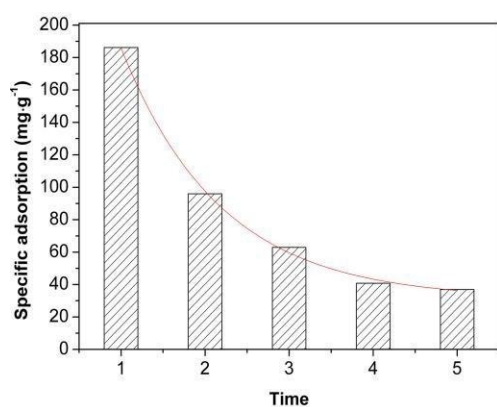

Figure S5. Reuse efficiency of the adsorbent.

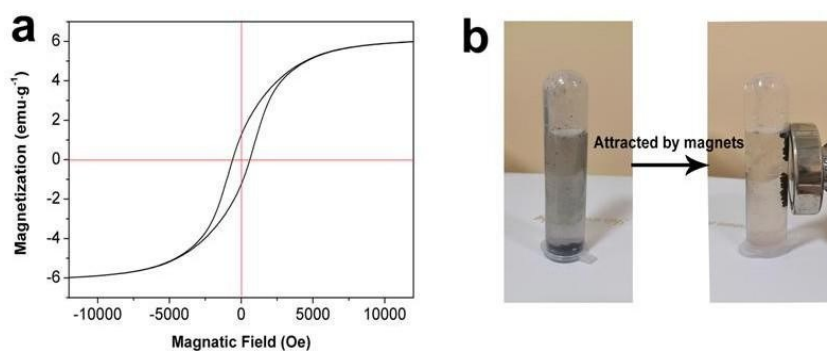

Figure S6. (a) Magnetic hysteresis curve of Fe/SA-C at room temperature; (b) magnetic propriety of Fe/SA-C.
